# Supplementary material for: Effects of short indels on protein structure and function in human genomes
Source: PubMed Central journal article supplement (PMC5570956; doi:10.1038/s41598-017-09287-x), 2017-08-24
Supplement: 41598_2017_9287_MOESM1_ESM.pdf [file 41598_2017_9287_MOESM1_ESM.pdf]

## **Supplementary data**

Effects of short indels on protein structure and function in human genomes

Maoxuan Lin, Sarah Whitmire, Jing Chen, Alvin Farrel, Xinghua Shi, Jun-tao Guo\*

Department of Bioinformatics and Genomics, The University of North Carolina at Charlotte,

Charlotte, NC 28223, USA

Figure S1. Functional enrichment analysis of genes having NFS (A and B) or FS (C and D) indels with either high allele frequency ( $\geq 1\%$ ) or low allele frequency ( $< 1\%$ ). Some genes have indels of both high and low allele frequencies (258 and 207 genes for NFS and FS indels respectively). Significantly enriched ( $p$ -values  $< 0.05$ ) categories are shown in terms of Biological Process (A and C) and Molecular Function (B and D).

**A** NFS indels, Biological Process

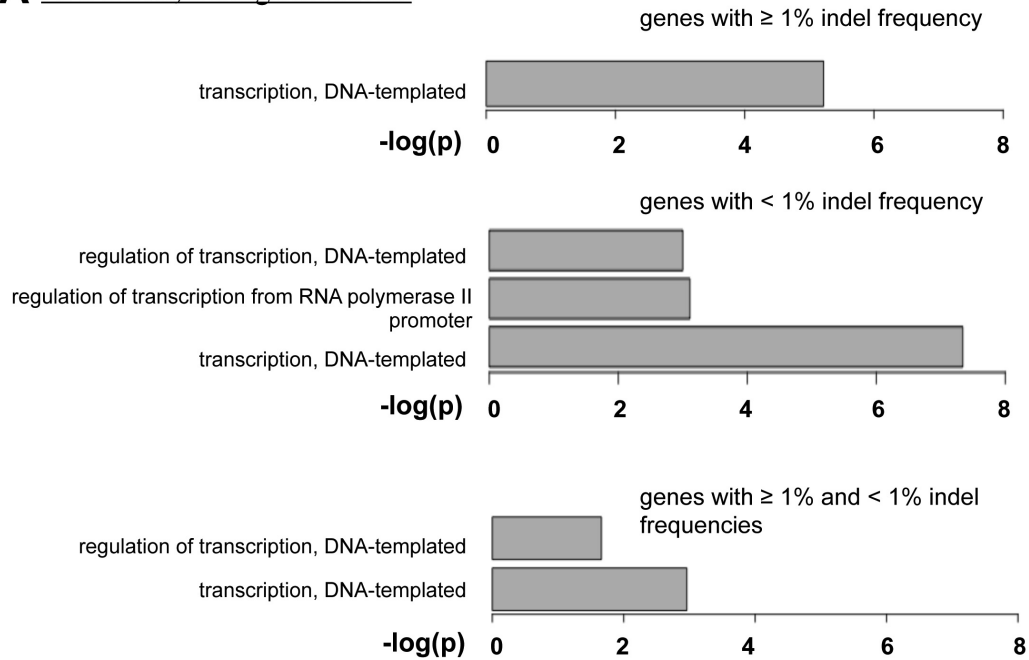

**B** NFS indels, Molecular Function

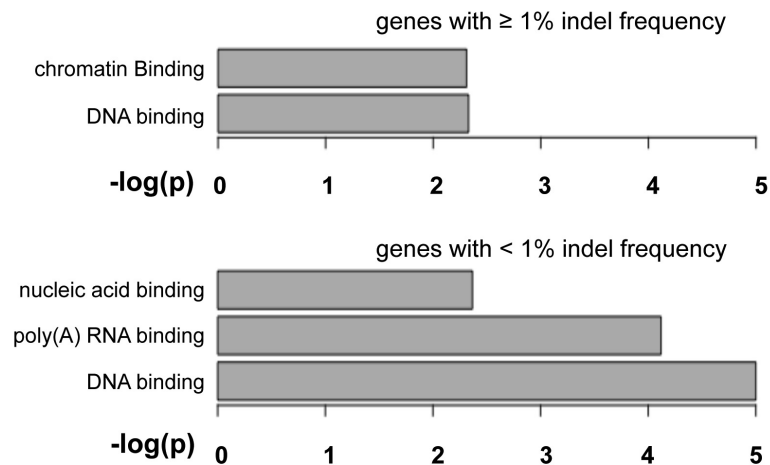

### C FS indels, Biological Process

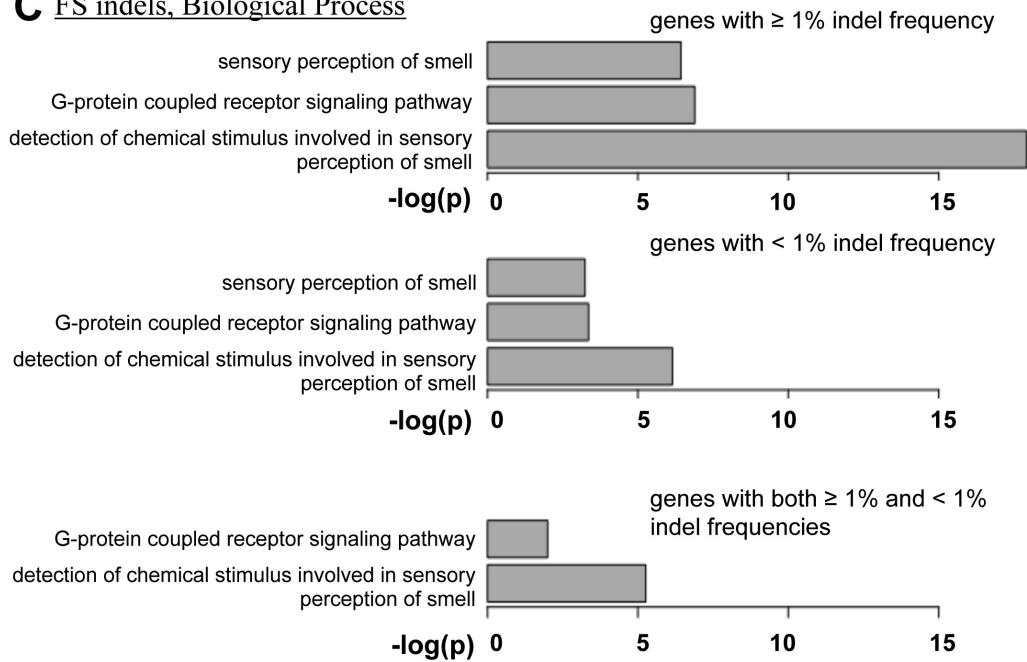

### D FS indels, Molecular Function

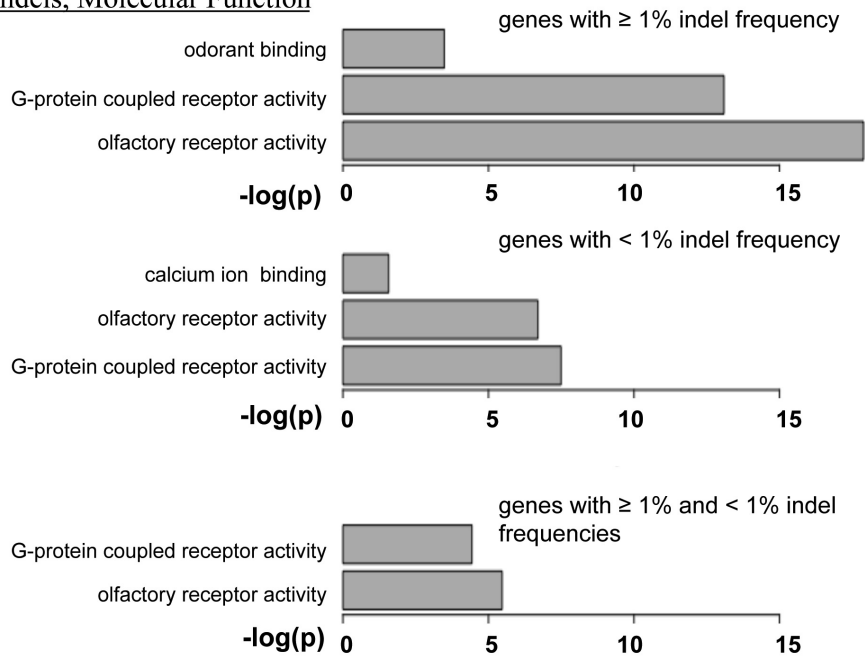

Figure S2. Comparisons of secondary structure types between high and low allele frequency NFS indels and indel types (insertion or deletion). (A) Distribution of all low frequency NFS indels; (B) Distribution of all high frequency NFS indels; (C) Distribution of homozygous low frequency NFS indels; (B) Distribution of homozygous high frequency NFS indels;

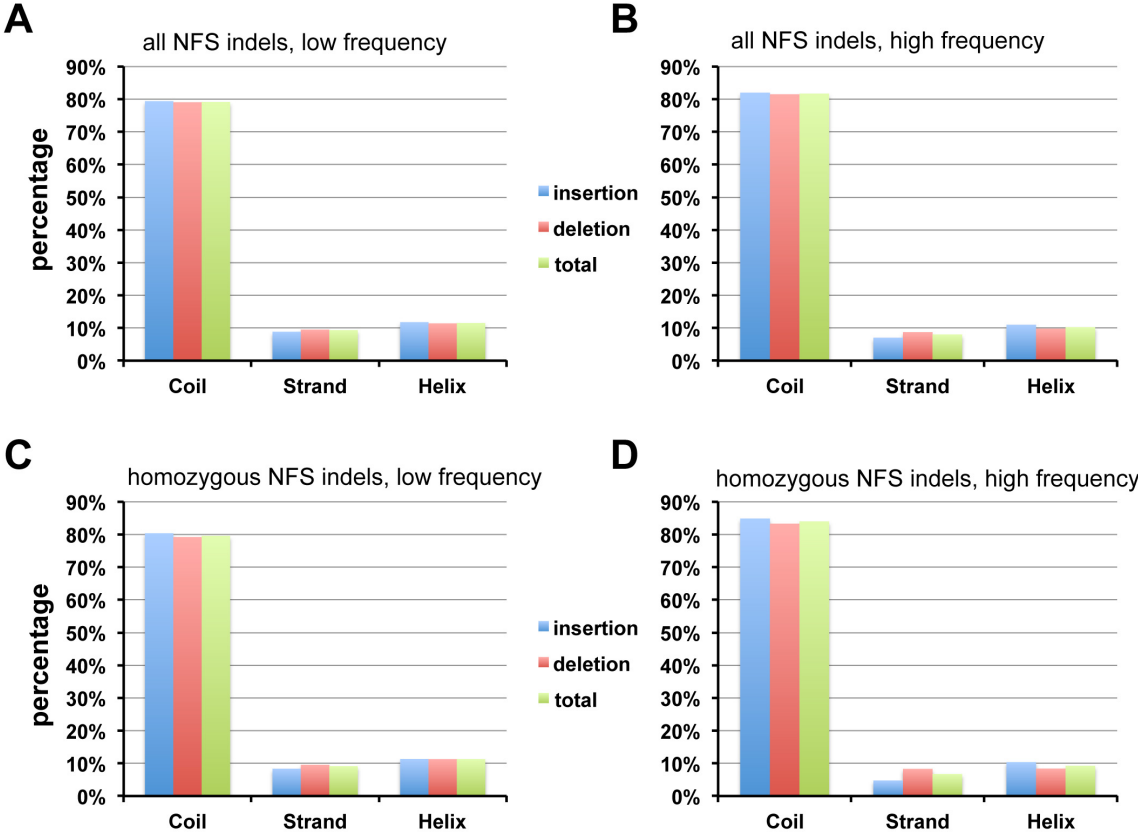

Figure S3. Comparisons of residue disorder prediction between high and low allele frequency NSF indels and indel types (insertion or deletion). (A) Distribution of all low frequency NFS indels; (B) Distribution of all high frequency NFS indels; (C) Distribution of homozygous low frequency NFS indels; (B) Distribution of homozygous high frequency NFS indels. A residue in an indel is considered “disordered” or “ordered” if both IUPred and DisProt agree; otherwise it is annotated as “inconclusive”.

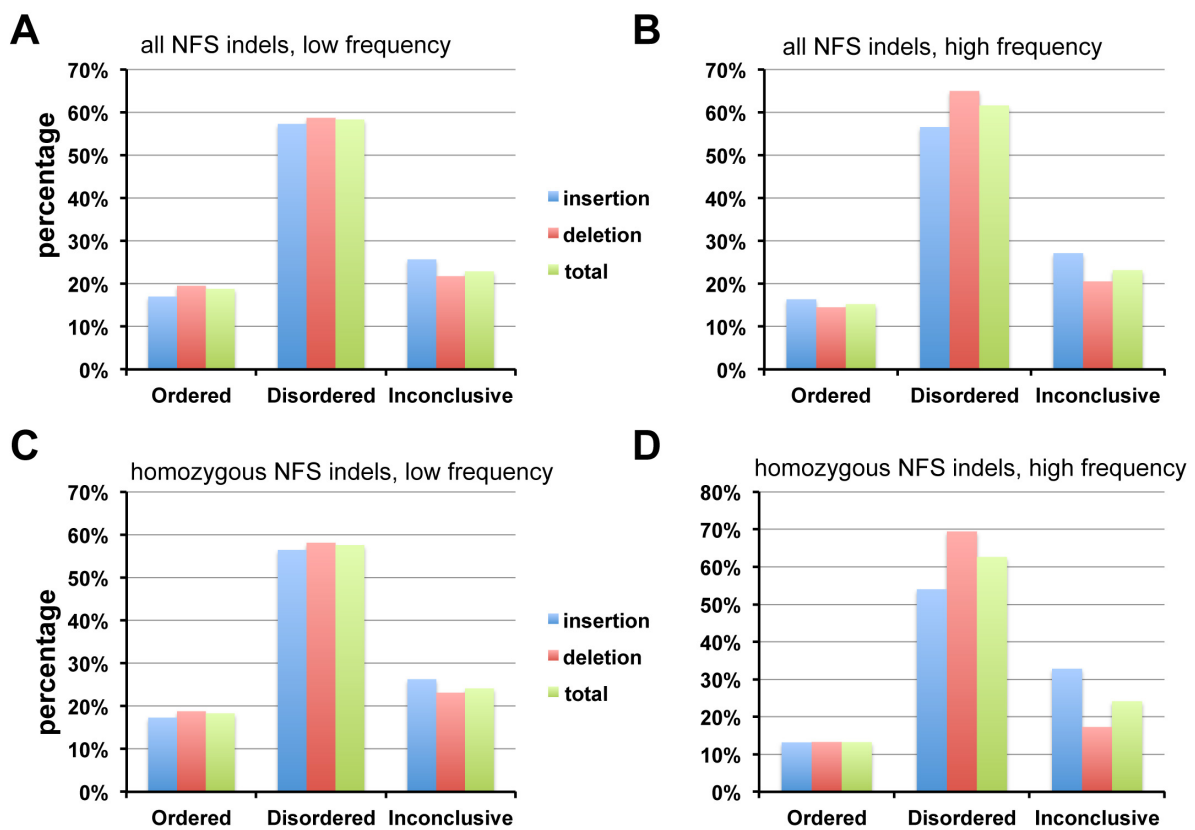

Table S1. High frequency homozygous indels among 2,504 individuals

| Frequency | Number of NFS indels (#genes) | Number of FS indels (#genes) |
|-----------|-------------------------------|------------------------------|
| >50%      | 72(72)                        | 137(118)                     |
| >60%      | 58(58)                        | 122(103)                     |
| >70%      | 44(44)                        | 110(93)                      |
| >80%      | 33(33)                        | 106(90)                      |
| >90%      | 28(28)                        | 101(85)                      |
| 100%      | 1(1)                          | 61(54)                       |

Table S2. Genes with NFS indels in more than 90 percent of the populations in the 1000 Genome Project. A deletion in *TAF4* (underlined) appears in all genomes.

| Ensembl_ID      | Gene        | Strand | Chr. | Position  | Type      | Length(bp) | Description                                              |
|-----------------|-------------|--------|------|-----------|-----------|------------|----------------------------------------------------------|
| ENSG00000141449 | GREB1L      | 1      | 18   | 19100758  | Insertion | 3          | growth regulation by estrogen in breast cancer-like      |
| ENSG00000130699 | <u>TAF4</u> | -1     | 20   | 60640305  | Deletion  | 6          | TAF4 RNA polymerase II, TBP-associated factor            |
| ENSG00000176731 | C8orf59     | -1     | 8    | 86126827  | Insertion | 6          | chromosome 8 open reading frame 59                       |
| ENSG00000196782 | MAML3       | -1     | 4    | 140651584 | Deletion  | 3          | mastermind-like 3 (Drosophila)                           |
| ENSG00000185442 | FAM174B     | -1     | 15   | 93198678  | Deletion  | 6          | family with sequence similarity 174, member B            |
| ENSG00000163067 | ZNF2        | 1      | 2    | 95847040  | Deletion  | 3          | zinc finger protein 2                                    |
| ENSG00000167311 | ART5        | -1     | 11   | 3661585   | Insertion | 3          | ADP-ribosyltransferase 5                                 |
| ENSG00000186564 | FOXD2       | 1      | 1    | 47904668  | Insertion | 6          | forkhead box D2                                          |
| ENSG00000115457 | IGFBP2      | 1      | 2    | 217498290 | Insertion | 9          | insulin-like growth factor binding protein 2, 36kDa      |
| ENSG00000160695 | VPS11       | 1      | 11   | 118939939 | Insertion | 3          | vacuolar protein sorting 11 homolog (S. cerevisiae)      |
| ENSG00000157827 | FMNL2       | 1      | 2    | 153476066 | Insertion | 3          | formin-like 2                                            |
| ENSG00000198598 | MMP17       | 1      | 12   | 132313098 | Insertion | 9          | matrix metalloproteinase 17                              |
| ENSG00000150630 | VEGFC       | -1     | 4    | 177605081 | Deletion  | 3          | vascular endothelial growth factor C                     |
| ENSG00000182500 | ORAI1       | 1      | 12   | 122064773 | Deletion  | 6          | ORAI calcium release-activated calcium modulator 1       |
| ENSG00000179532 | DNHD1       | 1      | 11   | 6567895   | Insertion | 12         | dynein heavy chain domain 1                              |
| ENSG00000162290 | DCP1A       | -1     | 3    | 53324819  | Deletion  | 6          | decapping mRNA 1A                                        |
| ENSG00000204842 | ATXN2       | -1     | 12   | 112036753 | Deletion  | 3          | ataxin 2                                                 |
| ENSG00000150045 | KLRF1       | 1      | 12   | 9994445   | Deletion  | 3          | killer cell lectin-like receptor subfamily F, member 1   |
| ENSG00000186472 | PCLO        | -1     | 7    | 82581488  | Insertion | 3          | piccolo presynaptic cytomatrix protein                   |
| ENSG00000176225 | RTTN        | -1     | 18   | 67863850  | Insertion | 3          | rotatin                                                  |
| ENSG00000012223 | LTF         | -1     | 3    | 46501284  | Insertion | 3          | lactotransferrin                                         |
| ENSG00000003147 | ICA1        | -1     | 7    | 8196567   | Deletion  | 18         | islet cell autoantigen 1, 69kDa                          |
| ENSG00000267909 | CCDC177     | -1     | 14   | 70039803  | Deletion  | 6          | Homo sapiens coiled-coil domain containing 177 (CCDC177) |
| ENSG00000239704 | CDRT4       | -1     | 17   | 15343524  | Insertion | 3          | CMT1A duplicated region transcript 4                     |
| ENSG00000196498 | NCOR2       | -1     | 12   | 124824721 | Insertion | 9          | nuclear receptor corepressor 2                           |
| ENSG00000179588 | ZFPM1       | 1      | 16   | 88599702  | Deletion  | 3          | zinc finger protein, FOG family member 1                 |
| ENSG00000173702 | MUC13       | -1     | 3    | 124646705 | Insertion | 3          | mucin 13, cell surface associated                        |
| ENSG00000127529 | OR7C2       | 1      | 19   | 15052983  | Insertion | 3          | olfactory receptor, family 7, subfamily C, member 2      |

Table S3. Genes with FS indels appear in all the populations of the 1000 Genome Project

| Ensembl_ID      | Gene      | Strand | Chr. | Position  | Type      | Length(bp) | Description                                                  |
|-----------------|-----------|--------|------|-----------|-----------|------------|--------------------------------------------------------------|
| ENSG00000174450 | GOLGA6L2  | -1     | 15   | 23685541  | Deletion  | 1          | golgin A6 family-like 2                                      |
| ENSG00000108819 | PPP1R9B   | -1     | 17   | 48227384  | Insertion | 2          | protein phosphatase 1, regulatory subunit 9B                 |
| ENSG00000108819 | PPP1R9B   | -1     | 17   | 48227403  | Insertion | 2          | protein phosphatase 1, regulatory subunit 9B                 |
| ENSG00000160957 | RECQL4    | -1     | 8    | 145738767 | Deletion  | 1          | RecQ protein-like 4                                          |
| ENSG00000103148 | NPRL3     | -1     | 16   | 138772    | Insertion | 1          | nitrogen permease regulator-like 3 (S. cerevisiae)           |
| ENSG00000115204 | MPV17     | -1     | 2    | 27535311  | Insertion | 1          | MpV17 mitochondrial inner membrane protein                   |
| ENSG00000147676 | MAL2      | 1      | 8    | 120220775 | Deletion  | 1          | mal, T-cell differentiation protein 2 (gene/pseudogene)      |
| ENSG00000159140 | SON       | 1      | 21   | 34948684  | Insertion | 1          | SON DNA binding protein                                      |
| ENSG00000159140 | SON       | 1      | 21   | 34948696  | Deletion  | 1          | SON DNA binding protein                                      |
| ENSG00000182253 | SYNM      | 1      | 15   | 99646107  | Insertion | 1          | synemin, intermediate filament protein                       |
| ENSG00000085365 | SCAMP1    | 1      | 5    | 77745853  | Insertion | 1          | secretory carrier membrane protein 1                         |
| ENSG00000116031 | CD207     | -1     | 2    | 71062833  | Insertion | 1          | CD207 molecule, langerin                                     |
| ENSG00000178814 | OPLAH     | -1     | 8    | 145106938 | Deletion  | 2          | 5-oxoprolinase (ATP-hydrolysing)                             |
| ENSG00000055163 | CYFIP2    | 1      | 5    | 156721863 | Insertion | 1          | cytoplasmic FMR1 interacting protein 2                       |
| ENSG00000169499 | PLEKHA2   | 1      | 8    | 38827185  | Deletion  | 1          | pleckstrin homology domain containing, family A              |
| ENSG00000004139 | SARM1     | 1      | 17   | 26699195  | Insertion | 1          | sterile alpha and TIR motif containing 1                     |
| ENSG00000004139 | SARM1     | 1      | 17   | 26699367  | Insertion | 1          | sterile alpha and TIR motif containing 1                     |
| ENSG00000185340 | GAS2L1    | 1      | 22   | 29707639  | Insertion | 1          | growth arrest-specific 2 like 1                              |
| ENSG00000137700 | SLC37A4   | -1     | 11   | 118898435 | Deletion  | 1          | solute carrier family 37 (glucose-6-phosphate transporter)   |
| ENSG00000006534 | ALDH3B1   | 1      | 11   | 67786064  | Insertion | 1          | aldehyde dehydrogenase 3 family, member B1                   |
| ENSG00000076351 | SLC46A1   | -1     | 17   | 26727721  | Deletion  | 1          | solute carrier family 46 (folate transporter), member 1      |
| ENSG00000181652 | ATG9B     | -1     | 7    | 150713902 | Insertion | 1          | autophagy related 9B                                         |
| ENSG00000090006 | LTPB4     | 1      | 19   | 41123093  | Insertion | 1          | latent transforming growth factor beta binding protein 4     |
| ENSG00000154035 | C17orf103 | -1     | 17   | 21156530  | Insertion | 1          | chromosome 17 open reading frame 103                         |
| ENSG00000258529 | ALG9      | -1     | 11   | 111742145 | Deletion  | 1          | Alpha-1,2-mannosyltransferase ALG9                           |
| ENSG00000150764 | DIXDC1    | 1      | 11   | 111853106 | Insertion | 1          | DIX domain containing 1                                      |
| ENSG00000231274 | SBK3      | -1     | 19   | 56052337  | Insertion | 1          | SH3 domain binding kinase family, member 3                   |
| ENSG00000113658 | SMAD5     | 1      | 5    | 135513085 | Insertion | 1          | SMAD family member 5                                         |
| ENSG00000149294 | NCAM1     | 1      | 11   | 112832339 | Deletion  | 1          | neural cell adhesion molecule 1                              |
| ENSG00000165862 | PNLIPRP2  | 1      | 10   | 118383463 | Insertion | 1          | pancreatic lipase-related protein 2                          |
| ENSG00000162040 | HS3ST6    | -1     | 16   | 1968338   | Insertion | 1          | heparan sulfate (glucosamine) 3-O-sulfotransferase 6         |
| ENSG00000167962 | ZNF598    | -1     | 16   | 2059621   | Deletion  | 1          | zinc finger protein 598                                      |
| ENSG00000244486 | SCARF2    | -1     | 22   | 20779973  | Insertion | 1          | scavenger receptor class F, member 2                         |
| ENSG00000244486 | SCARF2    | -1     | 22   | 20780024  | Insertion | 1          | scavenger receptor class F, member 2                         |
| ENSG00000244486 | SCARF2    | -1     | 22   | 20780029  | Insertion | 1          | scavenger receptor class F, member 2                         |
| ENSG00000129270 | MMP28     | -1     | 17   | 34100350  | Insertion | 1          | matrix metalloproteinase 28                                  |
| ENSG00000166333 | ILK       | 1      | 11   | 6630028   | Deletion  | 1          | integrin-linked kinase                                       |
| ENSG00000173566 | NUDT18    | -1     | 8    | 21966700  | Deletion  | 1          | nudix (nucleoside diphosphate linked moiety X)-type motif 18 |
| ENSG00000173566 | NUDT18    | -1     | 8    | 21966707  | Deletion  | 1          | nudix (nucleoside diphosphate linked moiety X)-type motif 18 |
| ENSG00000110057 | UNC93B1   | -1     | 11   | 67765163  | Insertion | 1          | unc-93 homolog B1 (C. elegans)                               |
| ENSG00000106631 | MYL7      | -1     | 7    | 44180079  | Insertion | 1          | myosin, light chain 7, regulatory                            |
| ENSG00000171606 | ZNF274    | 1      | 19   | 58718360  | Insertion | 1          | zinc finger protein 274                                      |
| ENSG00000004142 | POLDIP2   | -1     | 17   | 26684390  | Insertion | 1          | polymerase (DNA-directed), delta interacting protein 2       |
| ENSG00000042317 | SPATA7    | 1      | 14   | 88852279  | Deletion  | 1          | spermatogenesis associated 7                                 |
| ENSG00000253729 | PRKDC     | -1     | 8    | 48805816  | Insertion | 1          | protein kinase, DNA-activated, catalytic polypeptide         |
| ENSG00000101493 | ZNF516    | -1     | 18   | 74090957  | Deletion  | 1          | zinc finger protein 516                                      |
| ENSG00000139737 | SLAIN1    | 1      | 13   | 78272276  | Insertion | 1          | SLAIN motif family, member 1                                 |
| ENSG00000167984 | NLRC3     | -1     | 16   | 3602227   | Deletion  | 1          | NLR family, CARD domain containing 3                         |
| ENSG00000211852 | TRAJ37    | 1      | 14   | 22972783  | Deletion  | 1          | T cell receptor alpha joining 37                             |
| ENSG00000211853 | TRAJ36    | 1      | 14   | 22974150  | Deletion  | 1          | T cell receptor alpha joining 36                             |
| ENSG00000019144 | PHLDB1    | 1      | 11   | 118505676 | Deletion  | 1          | pleckstrin homology-like domain, family B, member 1          |
| ENSG00000152910 | CNTNAP4   | 1      | 16   | 76311602  | Insertion | 1          | contactin associated protein-like 4                          |
| ENSG00000272333 | KMT2B     | 1      | 19   | 36214632  | Insertion | 1          | Histone-lysine N-methyltransferase 2B                        |
| ENSG00000167595 | C19orf55  | 1      | 19   | 36258937  | Deletion  | 1          | chromosome 19 open reading frame 55                          |
| ENSG00000186806 | VSIG10L   | -1     | 19   | 51835892  | Insertion | 1          | V-set and immunoglobulin domain containing 10 like           |
| ENSG00000160963 | COL26A1   | 1      | 7    | 101200669 | Insertion | 1          | collagen, type XXVI, alpha 1                                 |
| ENSG00000198488 | B3GNT6    | 1      | 11   | 76751541  | Deletion  | 1          | betaGal beta-1,3-N-acetylglucosaminyltransferase 6           |
| ENSG00000198488 | B3GNT6    | 1      | 11   | 76751584  | Deletion  | 1          | betaGal beta-1,3-N-acetylglucosaminyltransferase 6           |
| ENSG00000198488 | B3GNT6    | 1      | 11   | 76751603  | Deletion  | 1          | betaGal beta-1,3-N-acetylglucosaminyltransferase 6           |
| ENSG00000196684 | HSH2D     | 1      | 19   | 16268207  | Deletion  | 1          | hematopoietic SH2 domain containing                          |
| ENSG00000008735 | MAPK8IP2  | 1      | 22   | 51042513  | Insertion | 1          | mitogen-activated protein kinase 8 interacting protein 2     |
| ENSG00000110811 | LEPREL2   | 1      | 12   | 6938023   | Insertion | 1          | leprecan-like 2                                              |

Table S4. List of genes with at least two FS indels appear on the same chromosome from the same individual genome.

| Gene     | Strand | Ensembl_ID       | Chromosome | # of individuals | Position  | Indel Type | Length(bp) |
|----------|--------|------------------|------------|------------------|-----------|------------|------------|
| SARM1    | 1      | ENSG00000004139  | 17         | 2504             | 26699195  | Insertion  | 1          |
|          |        |                  |            |                  | 26699199  | Insertion  | 1          |
|          |        |                  |            |                  | 26699367  | Insertion  | 1          |
| COPZ2    | -1     | ENSG00000005243  | 17         | 2504             | 46115072  | Insertion  | 1          |
|          |        |                  |            |                  | 46115122  | Insertion  | 1          |
|          |        |                  |            |                  | 46115084  | Insertion  | 2          |
| ALDH3B1  | 1      | ENSG00000006534  | 11         | 14               | 67786064  | Insertion  | 1          |
|          |        |                  |            |                  | 67789291  | Insertion  | 1          |
| CYP3A43  | 1      | ENSG00000021461  | 7          | 50               | 99434077  | Deletion   | 1          |
|          |        |                  |            |                  | 99463552  | Deletion   | 1          |
| IKZF2    | -1     | ENSG00000030419  | 2          | 31               | 214012404 | Insertion  | 1          |
|          |        |                  |            |                  | 214012405 | Insertion  | 1          |
| SERPINB3 | -1     | ENSG000000057149 | 18         | 257              | 61323012  | Insertion  | 1          |
|          |        |                  |            |                  | 61323011  | Insertion  | 2          |
| CTSA     | 1      | ENSG000000064601 | 20         | 202              | 44520257  | Deletion   | 1          |
|          |        |                  |            |                  | 44520260  | Deletion   | 1          |
|          |        |                  |            |                  | 44520257  | Deletion   | 2          |
|          |        |                  |            |                  | 44520259  | Deletion   | 2          |
| SPI1     | -1     | ENSG000000066336 | 11         | 3                | 47380218  | Deletion   | 4          |
|          |        |                  |            |                  | 47380276  | Insertion  | 2          |
| PHRF1    | 1      | ENSG000000070047 | 11         | 16               | 608506    | Deletion   | 10         |
|          |        |                  |            |                  | 608517    | Deletion   | 2          |
| CLTCL1   | -1     | ENSG000000070371 | 22         | 27               | 19170999  | Deletion   | 10         |
|          |        |                  |            |                  | 19171074  | Insertion  | 1          |
|          |        |                  |            |                  | 19189003  | Insertion  | 1          |
| CPSF1    | -1     | ENSG000000071894 | 8          | 11               | 145623003 | Deletion   | 2          |
|          |        |                  |            |                  | 145622990 | Deletion   | 7          |
| ATP12A   | 1      | ENSG000000075673 | 13         | 16               | 25266675  | Deletion   | 1          |
|          |        |                  |            |                  | 25266666  | Deletion   | 4          |
| EPDR1    | 1      | ENSG000000086289 | 7          | 2                | 37960262  | Deletion   | 13         |
|          |        |                  |            |                  | 37960406  | Deletion   | 5          |
|          |        |                  |            |                  | 97327135  | Deletion   | 2          |
| VRK1     | 1      | ENSG000000100749 | 14         | 35               | 97327098  | Insertion  | 2          |
|          |        |                  |            |                  | 97327098  | Insertion  | 2          |
| MROH8    | -1     | ENSG000000101353 | 20         | 28               | 35740759  | Deletion   | 1          |
|          |        |                  |            |                  | 35807797  | Deletion   | 2          |
|          |        |                  |            |                  | 35807790  | Insertion  | 29         |
|          |        |                  |            |                  | 35807790  | Insertion  | 29         |
| CEP192   | 1      | ENSG000000101639 | 18         | 64               | 13049811  | Deletion   | 1          |
|          |        |                  |            |                  | 13049813  | Deletion   | 2          |
| SLC25A14 | 1      | ENSG000000102078 | X          | 3                | 129493076 | Insertion  | 4          |
|          |        |                  |            |                  | 129493077 | Insertion  | 4          |
| DHDH     | 1      | ENSG000000104808 | 19         | 246              | 49447748  | Deletion   | 2          |
|          |        |                  |            |                  | 49442849  | Insertion  | 1          |
| HBP1     | 1      | ENSG000000105856 | 7          | 36               | 106826381 | Insertion  | 1          |
|          |        |                  |            |                  | 106826380 | Insertion  | 2          |
| PITRM1   | -1     | ENSG000000107959 | 10         | 2                | 3181184   | Deletion   | 2          |
|          |        |                  |            |                  | 3208567   | Insertion  | 25         |
| CYP27B1  | -1     | ENSG000000111012 | 12         | 6                | 58162765  | Deletion   | 2          |
|          |        |                  |            |                  | 58162768  | Insertion  | 1          |
| MYF5     | 1      | ENSG000000111049 | 12         | 4                | 81112731  | Deletion   | 1          |
|          |        |                  |            |                  | 81112733  | Deletion   | 2          |
| DUSP16   | -1     | ENSG000000111266 | 12         | 456              | 12630681  | Deletion   | 4          |
|          |        |                  |            |                  | 12630675  | Deletion   | 5          |
| TIMELESS | -1     | ENSG000000111602 | 12         | 9                | 56817449  | Insertion  | 1          |
|          |        |                  |            |                  | 56817451  | Insertion  | 2          |
| HSPA9    | -1     | ENSG000000113013 | 5          | 1                | 137896580 | Insertion  | 1          |
|          |        |                  |            |                  | 137896597 | Insertion  | 1          |
| ACADL    | -1     | ENSG000000115361 | 2          | 9                | 211068109 | Deletion   | 2          |
|          |        |                  |            |                  | 211068107 | Insertion  | 1          |
|          |        |                  |            |                  | 211068105 | Insertion  | 8          |
| CD207    | -1     | ENSG000000116031 | 2          | 52               | 71062870  | Deletion   | 1          |
|          |        |                  |            |                  | 71060821  | Deletion   | 2          |
|          |        |                  |            |                  | 71062833  | Insertion  | 1          |
| GRIN3B   | 1      | ENSG000000116032 | 19         | 4                | 1004589   | Deletion   | 2          |
|          |        |                  |            |                  | 1007860   | Insertion  | 1          |
|          |        |                  |            |                  | 1004896   | Insertion  | 4          |
| NRP2     | 1      | ENSG000000118257 | 2          | 123              | 206641239 | Deletion   | 4          |
|          |        |                  |            |                  | 206641245 | Insertion  | 1          |



|         |    |                 |    |      |           |           |    |
|---------|----|-----------------|----|------|-----------|-----------|----|
| OBP2A   | 1  | ENSG00000122136 | 9  | 7    | 138439733 | Deletion  | 2  |
|         |    |                 |    |      | 138441685 | Insertion | 1  |
| TNFAIP6 | 1  | ENSG00000123610 | 2  | 3    | 152236045 | Deletion  | 1  |
|         |    |                 |    |      | 152235992 | Insertion | 1  |
| SOX4    | 1  | ENSG00000124766 | 6  | 9    | 21595266  | Insertion | 1  |
|         |    |                 |    |      | 21595263  | Insertion | 2  |
| AMOT    | -1 | ENSG00000126016 | X  | 2    | 112022627 | Deletion  | 1  |
|         |    |                 |    |      | 112022655 | Deletion  | 1  |
|         |    |                 |    |      | 112022650 | Deletion  | 4  |
| PIN1    | 1  | ENSG00000127445 | 19 | 5    | 9948698   | Deletion  | 1  |
|         |    |                 |    |      | 9948693   | Deletion  | 2  |
| PODXL   | -1 | ENSG00000128567 | 7  | 25   | 131241045 | Deletion  | 1  |
|         |    |                 |    |      | 131241039 | Deletion  | 5  |
| TTI2    | -1 | ENSG00000129696 | 8  | 5    | 33370003  | Deletion  | 1  |
|         |    |                 |    |      | 33370000  | Deletion  | 2  |
| STK33   | -1 | ENSG00000130413 | 11 | 46   | 8414089   | Insertion | 1  |
|         |    |                 |    |      | 8414090   | Insertion | 5  |
| HRC     | -1 | ENSG00000130528 | 19 | 15   | 49657740  | Deletion  | 1  |
|         |    |                 |    |      | 49657742  | Deletion  | 2  |
| OLFM1   | 1  | ENSG00000130558 | 9  | 392  | 137968894 | Deletion  | 1  |
|         |    |                 |    |      | 137968914 | Insertion | 2  |
|         |    |                 |    |      | 137968919 | Insertion | 2  |
|         |    |                 |    |      | 137968996 | Insertion | 2  |
| PNPLA7  | -1 | ENSG00000130653 | 9  | 1    | 140373565 | Deletion  | 1  |
|         |    |                 |    |      | 140417185 | Deletion  | 5  |
|         |    |                 |    |      | 140356449 | Insertion | 1  |
|         |    |                 |    |      | 140437144 | Insertion | 1  |
| EPSTI1  | -1 | ENSG00000133106 | 13 | 12   | 43463359  | Insertion | 1  |
|         |    |                 |    |      | 43462434  | Insertion | 5  |
| AGAP3   | 1  | ENSG00000133612 | 7  | 2504 | 150783900 | Insertion | 1  |
|         |    |                 |    |      | 150783908 | Insertion | 1  |
| CHL1    | 1  | ENSG00000134121 | 3  | 185  | 239347    | Insertion | 1  |
|         |    |                 |    |      | 239555    | Insertion | 1  |
| DSG3    | 1  | ENSG00000134757 | 18 | 10   | 29054284  | Deletion  | 1  |
|         |    |                 |    |      | 29054289  | Deletion  | 2  |
| TROAP   | 1  | ENSG00000135451 | 12 | 19   | 49724075  | Deletion  | 1  |
|         |    |                 |    |      | 49724077  | Deletion  | 8  |
| AOAH    | -1 | ENSG00000136250 | 7  | 2504 | 36552729  | Insertion | 1  |
|         |    |                 |    |      | 36552790  | Insertion | 1  |
| IGFBPL1 | -1 | ENSG00000137142 | 9  | 48   | 38411403  | Deletion  | 7  |
|         |    |                 |    |      | 38411415  | Insertion | 1  |
| C4orf17 | 1  | ENSG00000138813 | 4  | 99   | 100443781 | Deletion  | 1  |
|         |    |                 |    |      | 100451038 | Deletion  | 10 |
|         |    |                 |    |      | 100451040 | Deletion  | 11 |
|         |    |                 |    |      | 100451049 | Deletion  | 2  |
| CELA1   | -1 | ENSG00000139610 | 12 | 1352 | 100460420 | Insertion | 1  |
|         |    |                 |    |      | 51735071  | Deletion  | 1  |
|         |    |                 |    |      | 51740414  | Deletion  | 2  |
|         |    |                 |    |      | 51723598  | Insertion | 1  |
| CTRL    | -1 | ENSG00000141086 | 16 | 5    | 51740413  | Insertion | 1  |
|         |    |                 |    |      | 67964623  | Deletion  | 2  |
| OR4D1   | 1  | ENSG00000141194 | 17 | 69   | 67964622  | Insertion | 1  |
|         |    |                 |    |      | 56232679  | Deletion  | 2  |
| ANP32E  | -1 | ENSG00000143401 | 1  | 111  | 56233444  | Insertion | 1  |
|         |    |                 |    |      | 150195603 | Deletion  | 1  |
| FLG     | -1 | ENSG00000143631 | 1  | 1    | 150195609 | Insertion | 1  |
|         |    |                 |    |      | 152279416 | Deletion  | 1  |
|         |    |                 |    |      | 152283937 | Deletion  | 1  |
|         |    |                 |    |      | 152284040 | Deletion  | 1  |
|         |    |                 |    |      | 152285076 | Deletion  | 4  |
|         |    |                 |    |      | 152280404 | Deletion  | 8  |
| VWDE    | -1 | ENSG00000146530 | 7  | 76   | 152284886 | Insertion | 17 |
|         |    |                 |    |      | 12381721  | Deletion  | 1  |
|         |    |                 |    |      | 12391268  | Insertion | 1  |
| ZAN     | 1  | ENSG00000146839 | 7  | 14   | 12417523  | Insertion | 1  |
|         |    |                 |    |      | 100364851 | Deletion  | 1  |
|         |    |                 |    |      | 100391838 | Deletion  | 1  |
|         |    |                 |    |      | 100346026 | Deletion  | 2  |
|         |    |                 |    |      | 100385561 | Deletion  | 35 |
| NCAM1   | 1  | ENSG00000149294 | 11 | 2504 | 100371476 | Insertion | 1  |
|         |    |                 |    |      | 100377138 | Insertion | 4  |
|         |    |                 |    |      | 112832339 | Deletion  | 1  |

|            |    |                 |    |      |           |           |    |
|------------|----|-----------------|----|------|-----------|-----------|----|
|            |    |                 |    |      | 112832276 | Insertion | 1  |
|            |    |                 |    |      | 112832307 | Insertion | 1  |
| PLOD2      | -1 | ENSG00000152952 | 3  | 36   | 145803137 | Insertion | 1  |
|            |    |                 |    |      | 145803138 | Insertion | 1  |
| ABCA10     | -1 | ENSG00000154263 | 17 | 816  | 67145190  | Deletion  | 2  |
|            |    |                 |    |      | 67184000  | Deletion  | 2  |
|            |    |                 |    |      | 67190117  | Deletion  | 2  |
|            |    |                 |    |      | 67181671  | Deletion  | 20 |
|            |    |                 |    |      | 67190536  | Deletion  | 4  |
|            |    |                 |    |      | 67161166  | Deletion  | 5  |
|            |    |                 |    |      | 67150465  | Insertion | 8  |
| CNTNAP3B   | 1  | ENSG00000154529 | 9  | 10   | 43816775  | Deletion  | 1  |
|            |    |                 |    |      | 43844264  | Deletion  | 1  |
|            |    |                 |    |      | 43844307  | Deletion  | 4  |
| MPPE1      | -1 | ENSG00000154889 | 18 | 4    | 11886988  | Deletion  | 1  |
|            |    |                 |    |      | 11886987  | Insertion | 2  |
| LAD1       | -1 | ENSG00000159166 | 1  | 383  | 201356001 | Deletion  | 1  |
|            |    |                 |    |      | 201356004 | Deletion  | 2  |
| ZNF66      | 1  | ENSG00000160229 | 19 | 347  | 20973551  | Insertion | 1  |
|            |    |                 |    |      | 20973560  | Insertion | 1  |
| MSLNL      | -1 | ENSG00000162006 | 16 | 369  | 825655    | Deletion  | 1  |
|            |    |                 |    |      | 830559    | Deletion  | 1  |
|            |    |                 |    |      | 830743    | Deletion  | 1  |
|            |    |                 |    |      | 830745    | Deletion  | 2  |
|            |    |                 |    |      | 820636    | Insertion | 1  |
|            |    |                 |    |      | 830766    | Insertion | 1  |
|            |    |                 |    |      | 830767    | Insertion | 2  |
| HS3ST6     | -1 | ENSG00000162040 | 16 | 5    | 1967982   | Insertion | 1  |
|            |    |                 |    |      | 1968338   | Insertion | 1  |
| RYK        | -1 | ENSG00000163785 | 3  | 2504 | 133969437 | Insertion | 1  |
|            |    |                 |    |      | 133969487 | Insertion | 1  |
| TIGD6      | -1 | ENSG00000164296 | 5  | 50   | 149374879 | Deletion  | 1  |
|            |    |                 |    |      | 149375720 | Deletion  | 1  |
|            |    |                 |    |      | 149374775 | Deletion  | 2  |
| TMEM67     | 1  | ENSG00000164953 | 8  | 103  | 94772148  | Insertion | 1  |
|            |    |                 |    |      | 94772206  | Insertion | 4  |
| SKA3       | -1 | ENSG00000165480 | 13 | 1    | 21729838  | Deletion  | 1  |
|            |    |                 |    |      | 21746600  | Deletion  | 1  |
| HTRA1      | 1  | ENSG00000166033 | 10 | 27   | 124221202 | Insertion | 1  |
|            |    |                 |    |      | 124221201 | Insertion | 2  |
| PKD1L2     | -1 | ENSG00000166473 | 16 | 551  | 81164183  | Deletion  | 1  |
|            |    |                 |    |      | 81194421  | Deletion  | 1  |
|            |    |                 |    |      | 81242148  | Deletion  | 2  |
|            |    |                 |    |      | 81253916  | Deletion  | 2  |
|            |    |                 |    |      | 81194328  | Deletion  | 5  |
|            |    |                 |    |      | 81161473  | Insertion | 22 |
| AC018755.1 | -1 | ENSG00000167765 | 19 | 52   | 52097396  | Deletion  | 1  |
|            |    |                 |    |      | 52096033  | Deletion  | 5  |
|            |    |                 |    |      | 52097560  | Insertion | 1  |
| ZNF83      | -1 | ENSG00000167766 | 19 | 11   | 53116985  | Deletion  | 1  |
|            |    |                 |    |      | 53116949  | Insertion | 1  |
|            |    |                 |    |      | 53116948  | Insertion | 2  |
| ZNF598     | -1 | ENSG00000167962 | 16 | 2504 | 2059621   | Deletion  | 1  |
|            |    |                 |    |      | 2059736   | Deletion  | 1  |
| DHR SX     | -1 | ENSG00000169084 | X  | 1    | 2418591   | Deletion  | 2  |
|            |    |                 |    |      | 2418620   | Deletion  | 5  |
| ZNF212     | 1  | ENSG00000170260 | 7  | 19   | 148936895 | Deletion  | 1  |
|            |    |                 |    |      | 148936917 | Deletion  | 16 |
|            |    |                 |    |      | 148937011 | Insertion | 10 |
| OR7G3      | -1 | ENSG00000170920 | 19 | 307  | 9236916   | Deletion  | 1  |
|            |    |                 |    |      | 9236698   | Insertion | 5  |
| FBXW10     | 1  | ENSG00000171931 | 17 | 2    | 18681857  | Deletion  | 1  |
|            |    |                 |    |      | 18647847  | Deletion  | 2  |
|            |    |                 |    |      | 18653309  | Insertion | 1  |
|            |    |                 |    |      | 18653174  | Insertion | 4  |
| OR8I2      | 1  | ENSG00000172154 | 11 | 190  | 55861277  | Deletion  | 1  |
|            |    |                 |    |      | 55861306  | Deletion  | 1  |
| MANEA      | 1  | ENSG00000172469 | 6  | 130  | 96034895  | Deletion  | 2  |
|            |    |                 |    |      | 96034881  | Insertion | 2  |
|            |    |                 |    |      | 96034881  | Insertion | 4  |
|            |    |                 |    |      | 96034881  | Insertion | 4  |
|            |    |                 |    |      | 96034869  | Insertion | 5  |
|            |    |                 |    |      | 96034881  | Insertion | 8  |

|          |    |                 |    |      |           |           |    |
|----------|----|-----------------|----|------|-----------|-----------|----|
|          |    |                 |    |      | 96034881  | Insertion | 8  |
| C17orf66 | -1 | ENSG00000172653 | 17 | 3    | 34190017  | Deletion  | 1  |
|          |    |                 |    |      | 34182099  | Insertion | 1  |
| CD7      | -1 | ENSG00000173762 | 17 | 59   | 80274161  | Deletion  | 1  |
|          |    |                 |    |      | 80274159  | Insertion | 1  |
| OR4S2    | 1  | ENSG00000174982 | 11 | 3    | 55418991  | Deletion  | 1  |
|          |    |                 |    |      | 55418995  | Deletion  | 1  |
| TP53I11  | -1 | ENSG00000175274 | 11 | 4    | 44924950  | Deletion  | 1  |
|          |    |                 |    |      | 44925373  | Deletion  | 1  |
|          |    |                 |    |      | 44925359  | Insertion | 1  |
| TSGA10IP | 1  | ENSG00000175513 | 11 | 15   | 65713196  | Deletion  | 11 |
|          |    |                 |    |      | 65713170  | Insertion | 17 |
| TPRN     | -1 | ENSG00000176058 | 9  | 5    | 140087040 | Deletion  | 1  |
|          |    |                 |    |      | 140087043 | Deletion  | 2  |
| OR4L1    | 1  | ENSG00000176246 | 14 | 68   | 20528600  | Deletion  | 1  |
|          |    |                 |    |      | 20528448  | Deletion  | 19 |
|          |    |                 |    |      | 20528397  | Deletion  | 2  |
|          |    |                 |    |      | 20528880  | Insertion | 1  |
| OR10AC1P | -1 | ENSG00000176510 | 7  | 9    | 143208084 | Deletion  | 1  |
|          |    |                 |    |      | 143208737 | Deletion  | 1  |
| MUC20    | 1  | ENSG00000176945 | 3  | 6    | 195452663 | Deletion  | 1  |
|          |    |                 |    |      | 195453017 | Deletion  | 1  |
|          |    |                 |    |      | 195456537 | Deletion  | 1  |
|          |    |                 |    |      | 195453042 | Deletion  | 2  |
| OR2T12   | -1 | ENSG00000177201 | 1  | 1    | 248458875 | Deletion  | 1  |
|          |    |                 |    |      | 248458132 | Deletion  | 2  |
|          |    |                 |    |      | 248458629 | Deletion  | 5  |
| OR2A1    | 1  | ENSG00000177275 | 1  | 8    | 248097335 | Deletion  | 1  |
|          |    |                 |    |      | 248097842 | Deletion  | 1  |
|          |    |                 |    |      | 248097443 | Deletion  | 4  |
|          |    |                 |    |      | 248098037 | Deletion  | 4  |
| ACOT4    | 1  | ENSG00000177465 | 14 | 2    | 74060517  | Insertion | 1  |
|          |    |                 |    |      | 74060511  | Insertion | 4  |
| IRX3     | -1 | ENSG00000177508 | 16 | 4    | 54317566  | Insertion | 1  |
|          |    |                 |    |      | 54317575  | Insertion | 1  |
|          |    |                 |    |      | 54317583  | Insertion | 1  |
| TMEM78   | 1  | ENSG00000177800 | 1  | 1    | 229385667 | Deletion  | 2  |
|          |    |                 |    |      | 229385669 | Deletion  | 2  |
|          |    |                 |    |      | 229385594 | Deletion  | 4  |
|          |    |                 |    |      | 229385720 | Deletion  | 4  |
| BET1L    | -1 | ENSG00000177951 | 11 | 16   | 180317    | Insertion | 1  |
|          |    |                 |    |      | 180318    | Insertion | 1  |
| PDE4DIP  | -1 | ENSG00000178104 | 1  | 744  | 144873962 | Deletion  | 1  |
|          |    |                 |    |      | 144917827 | Deletion  | 1  |
|          |    |                 |    |      | 144923728 | Deletion  | 1  |
| RNF212   | -1 | ENSG00000178222 | 4  | 2324 | 1087327   | Insertion | 17 |
|          |    |                 |    |      | 1087328   | Insertion | 2  |
|          |    |                 |    |      | 1087329   | Insertion | 2  |
| FAM132B  | 1  | ENSG00000178752 | 2  | 2    | 239072419 | Deletion  | 1  |
|          |    |                 |    |      | 239067797 | Insertion | 8  |
| ARID3B   | 1  | ENSG00000179361 | 15 | 8    | 74836316  | Insertion | 1  |
|          |    |                 |    |      | 74836315  | Insertion | 2  |
| ZFPM1    | 1  | ENSG00000179588 | 16 | 2495 | 88599700  | Deletion  | 1  |
|          |    |                 |    |      | 88599695  | Deletion  | 2  |
|          |    |                 |    |      | 88600697  | Insertion | 1  |
| CRIPAK   | 1  | ENSG00000179979 | 4  | 582  | 1388672   | Deletion  | 1  |
|          |    |                 |    |      | 1388922   | Deletion  | 1  |
|          |    |                 |    |      | 1388344   | Deletion  | 2  |
|          |    |                 |    |      | 1388409   | Deletion  | 2  |
|          |    |                 |    |      | 1388503   | Deletion  | 2  |
|          |    |                 |    |      | 1388562   | Deletion  | 2  |
|          |    |                 |    |      | 1388713   | Deletion  | 2  |
|          |    |                 |    |      | 1388744   | Deletion  | 2  |
|          |    |                 |    |      | 1388899   | Deletion  | 2  |
|          |    |                 |    |      | 1388961   | Deletion  | 2  |
|          |    |                 |    |      | 1389146   | Deletion  | 2  |
|          |    |                 |    |      | 1389360   | Deletion  | 2  |
|          |    |                 |    |      | 1389424   | Deletion  | 2  |
|          |    |                 |    |      | 1388569   | Deletion  | 5  |
|          |    |                 |    |      | 1388375   | Insertion | 2  |
|          |    |                 |    |      | 1388530   | Insertion | 2  |
|          |    |                 |    |      | 1388622   | Insertion | 2  |
|          |    |                 |    |      | 1388682   | Insertion | 2  |

|           |    |                 |    |      |           |           |    |
|-----------|----|-----------------|----|------|-----------|-----------|----|
|           |    |                 |    |      | 1388930   | Insertion | 2  |
|           |    |                 |    |      | 1389117   | Insertion | 2  |
| PSMG4     | 1  | ENSG00000180822 | 6  | 4    | 3255401   | Deletion  | 1  |
|           |    |                 |    |      | 3255405   | Deletion  | 1  |
| OR52D1    | 1  | ENSG00000181609 | 11 | 9    | 5510498   | Insertion | 1  |
|           |    |                 |    |      | 5510540   | Insertion | 4  |
| PTCHD3    | -1 | ENSG00000182077 | 10 | 3    | 27687759  | Deletion  | 1  |
|           |    |                 |    |      | 27702950  | Deletion  | 1  |
|           |    |                 |    |      | 27687534  | Insertion | 1  |
|           |    |                 |    |      | 27702256  | Insertion | 1  |
|           |    |                 |    |      | 27702261  | Insertion | 1  |
|           |    |                 |    |      | 27703042  | Insertion | 1  |
| TSPAN10   | 1  | ENSG00000182612 | 17 | 3    | 79612504  | Deletion  | 1  |
|           |    |                 |    |      | 79614932  | Deletion  | 4  |
| ZNF721    | -1 | ENSG00000182903 | 4  | 1    | 436992    | Deletion  | 1  |
|           |    |                 |    |      | 435540    | Deletion  | 2  |
|           |    |                 |    |      | 437947    | Deletion  | 5  |
| ABHD16B   | 1  | ENSG00000183260 | 20 | 3    | 62494218  | Deletion  | 2  |
|           |    |                 |    |      | 62494226  | Insertion | 1  |
|           |    |                 |    |      | 62493175  | Insertion | 23 |
| C1QTNF8   | -1 | ENSG00000184471 | 16 | 7    | 1143523   | Deletion  | 1  |
|           |    |                 |    |      | 1143508   | Deletion  | 14 |
|           |    |                 |    |      | 1143978   | Insertion | 1  |
| AHNAK2    | -1 | ENSG00000185567 | 14 | 4    | 105417462 | Deletion  | 1  |
|           |    |                 |    |      | 105415409 | Deletion  | 2  |
|           |    |                 |    |      | 105417468 | Insertion | 1  |
|           |    |                 |    |      | 105418452 | Insertion | 1  |
| PDIA2     | 1  | ENSG00000185615 | 16 | 1    | 336700    | Deletion  | 2  |
|           |    |                 |    |      | 336462    | Deletion  | 4  |
|           |    |                 |    |      | 336888    | Insertion | 1  |
|           |    |                 |    |      | 335584    | Insertion | 7  |
| SPATA31A6 | -1 | ENSG00000185775 | 9  | 15   | 43627263  | Insertion | 5  |
|           |    |                 |    |      | 43627265  | Insertion | 7  |
| PRSS38    | 1  | ENSG00000185888 | 1  | 4    | 228033701 | Insertion | 2  |
|           |    |                 |    |      | 228033700 | Insertion | 4  |
| WWOX      | 1  | ENSG00000186153 | 16 | 2    | 79245892  | Deletion  | 5  |
|           |    |                 |    |      | 79245873  | Insertion | 5  |
|           |    |                 |    |      | 79245998  | Insertion | 5  |
| NUDT17    | -1 | ENSG00000186364 | 1  | 69   | 145586678 | Deletion  | 1  |
|           |    |                 |    |      | 145586671 | Deletion  | 5  |
| C14orf23  | 1  | ENSG00000186960 | 14 | 1167 | 29261309  | Insertion | 1  |
|           |    |                 |    |      | 29261306  | Insertion | 2  |
| OR2T27    | -1 | ENSG00000187701 | 1  | 7    | 248813309 | Insertion | 1  |
|           |    |                 |    |      | 248813733 | Insertion | 1  |
| PLA2G4E   | -1 | ENSG00000188089 | 15 | 17   | 42302330  | Insertion | 1  |
|           |    |                 |    |      | 42302338  | Insertion | 1  |
|           |    |                 |    |      | 42302330  | Insertion | 2  |
| NUTM2G    | 1  | ENSG00000188152 | 9  | 25   | 99694588  | Deletion  | 1  |
|           |    |                 |    |      | 99694583  | Deletion  | 2  |
| ZNF626    | -1 | ENSG00000188171 | 19 | 7    | 20807935  | Deletion  | 2  |
|           |    |                 |    |      | 20807177  | Insertion | 1  |
| ANKDD1B   | 1  | ENSG00000189045 | 5  | 130  | 74931681  | Deletion  | 1  |
|           |    |                 |    |      | 74907504  | Deletion  | 13 |
|           |    |                 |    |      | 74931676  | Deletion  | 4  |
| OR6K2     | -1 | ENSG00000196171 | 1  | 3    | 158669770 | Deletion  | 2  |
|           |    |                 |    |      | 158670074 | Deletion  | 2  |
|           |    |                 |    |      | 158669774 | Insertion | 1  |
| OR4Q2     | 1  | ENSG00000196383 | 14 | 9    | 20470852  | Deletion  | 1  |
|           |    |                 |    |      | 20470582  | Insertion | 7  |
| OR5AC2    | 1  | ENSG00000196578 | 3  | 63   | 97806298  | Deletion  | 1  |
|           |    |                 |    |      | 97806700  | Insertion | 1  |
| MAML3     | -1 | ENSG00000196782 | 4  | 9    | 140811083 | Deletion  | 10 |
|           |    |                 |    |      | 140811085 | Deletion  | 11 |
|           |    |                 |    |      | 140811094 | Deletion  | 2  |
| OR2T4     | 1  | ENSG00000196944 | 1  | 234  | 248525638 | Deletion  | 1  |
|           |    |                 |    |      | 248524964 | Deletion  | 2  |
|           |    |                 |    |      | 248525287 | Deletion  | 4  |
|           |    |                 |    |      | 248525328 | Insertion | 2  |
| ZNF860    | 1  | ENSG00000197385 | 3  | 34   | 32030579  | Deletion  | 1  |
|           |    |                 |    |      | 32031990  | Deletion  | 2  |
|           |    |                 |    |      | 32031987  | Insertion | 1  |
|           |    |                 |    |      | 32031988  | Insertion | 1  |
| HIST4H4   | -1 | ENSG00000197837 | 12 | 20   | 14923934  | Insertion | 1  |

|            |    |                 |    |      |           |           |    |
|------------|----|-----------------|----|------|-----------|-----------|----|
|            |    |                 |    |      | 14923935  | Insertion | 1  |
| PEG3       | -1 | ENSG00000198300 | 19 | 4    | 57335978  | Deletion  | 1  |
|            |    |                 |    |      | 57335984  | Deletion  | 1  |
|            |    |                 |    |      | 57328278  | Deletion  | 2  |
|            |    |                 |    |      | 57335982  | Insertion | 2  |
| RTP2       | -1 | ENSG00000198471 | 3  | 65   | 187416762 | Deletion  | 1  |
|            |    |                 |    |      | 187416758 | Insertion | 1  |
| OR2M2      | 1  | ENSG00000198601 | 1  | 4    | 248343601 | Deletion  | 1  |
|            |    |                 |    |      | 248343603 | Deletion  | 2  |
| MUC2       | 1  | ENSG00000198788 | 11 | 67   | 1092801   | Deletion  | 1  |
|            |    |                 |    |      | 1092503   | Deletion  | 5  |
|            |    |                 |    |      | 1092669   | Insertion | 2  |
|            |    |                 |    |      | 1092799   | Insertion | 2  |
|            |    |                 |    |      | 1092804   | Insertion | 4  |
| EFCAB2     | 1  | ENSG00000203666 | 1  | 1696 | 245133549 | Deletion  | 2  |
|            |    |                 |    |      | 245133623 | Insertion | 5  |
| PNLIPRP3   | 1  | ENSG00000203837 | 10 | 3    | 118231356 | Deletion  | 2  |
|            |    |                 |    |      | 118215310 | Insertion | 1  |
|            |    |                 |    |      | 118231360 | Insertion | 2  |
| LCN6       | -1 | ENSG00000204003 | 9  | 4    | 139639190 | Insertion | 1  |
|            |    |                 |    |      | 139639192 | Insertion | 1  |
| AGAP6      | 1  | ENSG00000204149 | 10 | 7    | 51748681  | Deletion  | 1  |
|            |    |                 |    |      | 51769222  | Deletion  | 14 |
|            |    |                 |    |      | 51768674  | Deletion  | 2  |
| MICA       | 1  | ENSG00000204520 | 6  | 227  | 31380001  | Deletion  | 1  |
|            |    |                 |    |      | 31380160  | Deletion  | 1  |
|            |    |                 |    |      | 31380157  | Deletion  | 4  |
|            |    |                 |    |      | 31380161  | Insertion | 11 |
|            |    |                 |    |      | 31380161  | Insertion | 2  |
|            |    |                 |    |      | 31380161  | Insertion | 8  |
| AC006486.1 | 1  | ENSG00000204957 | 19 | 3    | 42747179  | Deletion  | 1  |
|            |    |                 |    |      | 42747163  | Deletion  | 8  |
| PCDHA4     | 1  | ENSG00000204967 | 5  | 1140 | 140186984 | Deletion  | 1  |
|            |    |                 |    |      | 140186988 | Deletion  | 2  |
| MUC19      | 1  | ENSG00000205592 | 12 | 1421 | 40843506  | Deletion  | 1  |
|            |    |                 |    |      | 40875134  | Deletion  | 1  |
|            |    |                 |    |      | 40826435  | Deletion  | 2  |
|            |    |                 |    |      | 40867032  | Deletion  | 2  |
|            |    |                 |    |      | 40830450  | Deletion  | 4  |
|            |    |                 |    |      | 40875574  | Insertion | 1  |
|            |    |                 |    |      | 40879206  | Insertion | 2  |
| CYP2D7P    | -1 | ENSG00000205702 | 22 | 6    | 42538040  | Deletion  | 1  |
|            |    |                 |    |      | 42540327  | Deletion  | 1  |
|            |    |                 |    |      | 42538514  | Insertion | 1  |
| C21orf49   | 1  | ENSG00000205930 | 21 | 3    | 34169317  | Insertion | 1  |
|            |    |                 |    |      | 34160986  | Insertion | 7  |
| HLA-A      | 1  | ENSG00000206503 | 6  | 154  | 29912028  | Deletion  | 1  |
|            |    |                 |    |      | 29910728  | Insertion | 1  |
|            |    |                 |    |      | 29912395  | Insertion | 2  |
| OR5K3      | 1  | ENSG00000206536 | 3  | 4    | 98110067  | Deletion  | 4  |
|            |    |                 |    |      | 98110406  | Insertion | 1  |
| CCDC183    | 1  | ENSG00000213213 | 9  | 5    | 139694454 | Insertion | 1  |
|            |    |                 |    |      | 139694457 | Insertion | 1  |
|            |    |                 |    |      | 139694456 | Insertion | 2  |
| SRA1       | -1 | ENSG00000213523 | 5  | 1640 | 139931629 | Insertion | 1  |
|            |    |                 |    |      | 139931628 | Insertion | 2  |
| TTLL3      | 1  | ENSG00000214021 | 3  | 22   | 9876877   | Deletion  | 1  |
|            |    |                 |    |      | 9876871   | Deletion  | 2  |
|            |    |                 |    |      | 9876874   | Deletion  | 2  |
|            |    |                 |    |      | 9877088   | Deletion  | 2  |
| LINC00955  | 1  | ENSG00000216560 | 4  | 1539 | 3589697   | Deletion  | 1  |
|            |    |                 |    |      | 3589719   | Deletion  | 1  |
|            |    |                 |    |      | 3590823   | Deletion  | 2  |
|            |    |                 |    |      | 3590872   | Deletion  | 2  |
| ZNF812     | -1 | ENSG00000224689 | 19 | 16   | 9800968   | Deletion  | 1  |
|            |    |                 |    |      | 9801440   | Deletion  | 5  |
| MROH5      | -1 | ENSG00000226807 | 8  | 2    | 142451265 | Deletion  | 1  |
|            |    |                 |    |      | 142477563 | Deletion  | 1  |
|            |    |                 |    |      | 142506588 | Deletion  | 1  |
|            |    |                 |    |      | 142459777 | Insertion | 1  |
| OR2T7      | 1  | ENSG00000227152 | 1  | 166  | 248604929 | Insertion | 1  |
|            |    |                 |    |      | 248605354 | Insertion | 1  |
|            |    |                 |    |      | 248604559 | Insertion | 2  |

|                    |    |                 |    |      |           |           |    |
|--------------------|----|-----------------|----|------|-----------|-----------|----|
| OR52I1             | 1  | ENSG00000232268 | 11 | 13   | 4615776   | Deletion  | 1  |
|                    |    |                 |    |      | 4615773   | Deletion  | 2  |
| HLA-B              | -1 | ENSG00000234745 | 6  | 306  | 31324493  | Deletion  | 1  |
|                    |    |                 |    |      | 31324496  | Deletion  | 1  |
|                    |    |                 |    |      | 31324601  | Insertion | 1  |
|                    |    |                 |    |      | 31324489  | Insertion | 3  |
| AP001468.1         | -1 | ENSG00000235878 | 21 | 25   | 47612508  | Insertion | 2  |
|                    |    |                 |    |      | 47612512  | Insertion | 2  |
| OR5G3              | -1 | ENSG00000241356 | 11 | 2215 | 56587500  | Deletion  | 1  |
|                    |    |                 |    |      | 56587650  | Insertion | 1  |
| PSG4               | -1 | ENSG00000243137 | 19 | 76   | 43708974  | Deletion  | 1  |
|                    |    |                 |    |      | 43708978  | Deletion  | 1  |
| FOXD1              | -1 | ENSG00000251493 | 5  | 4    | 72743876  | Deletion  | 1  |
|                    |    |                 |    |      | 72743299  | Insertion | 2  |
| PRKDC              | -1 | ENSG00000253729 | 8  | 8    | 48866909  | Deletion  | 1  |
|                    |    |                 |    |      | 48805816  | Insertion | 1  |
| STX16-<br>NPEPL1   | 1  | ENSG00000254995 | 20 | 19   | 57266239  | Deletion  | 1  |
|                    |    |                 |    |      | 57266263  | Deletion  | 2  |
| RP11-<br>297N6.4   | -1 | ENSG00000255046 | 8  | 41   | 11659375  | Deletion  | 1  |
|                    |    |                 |    |      | 11659516  | Deletion  | 1  |
| OR13C5             | -1 | ENSG00000255800 | 9  | 263  | 107360768 | Deletion  | 1  |
|                    |    |                 |    |      | 107361178 | Deletion  | 4  |
| OR13C2             | -1 | ENSG00000257019 | 9  | 1352 | 107367664 | Deletion  | 2  |
|                    |    |                 |    |      | 107367392 | Deletion  | 4  |
| MUC22              | 1  | ENSG00000261272 | 6  | 4    | 30995114  | Deletion  | 1  |
|                    |    |                 |    |      | 30995245  | Deletion  | 1  |
|                    |    |                 |    |      | 30996491  | Deletion  | 1  |
|                    |    |                 |    |      | 30996488  | Deletion  | 2  |
| TUBB8P7            | 1  | ENSG00000261812 | 16 | 672  | 90161965  | Deletion  | 1  |
|                    |    |                 |    |      | 90161003  | Insertion | 2  |
| GFY                | 1  | ENSG00000261949 | 19 | 6    | 49931887  | Deletion  | 4  |
|                    |    |                 |    |      | 49931882  | Insertion | 2  |
| LCN6               | -1 | ENSG00000267206 | 9  | 4    | 139639190 | Insertion | 1  |
|                    |    |                 |    |      | 139639192 | Insertion | 1  |
| AC092850.1         | 1  | ENSG00000267819 | 12 | 2    | 131781582 | Deletion  | 2  |
|                    |    |                 |    |      | 131781120 | Insertion | 1  |
| AC026740.1         | 1  | ENSG00000268885 | 5  | 385  | 668757    | Deletion  | 1  |
|                    |    |                 |    |      | 668429    | Deletion  | 2  |
|                    |    |                 |    |      | 668654    | Deletion  | 4  |
|                    |    |                 |    |      | 668663    | Deletion  | 4  |
|                    |    |                 |    |      | 668574    | Insertion | 1  |
| AC020952.1         | 1  | ENSG00000268953 | 19 | 6    | 31640469  | Insertion | 8  |
|                    |    |                 |    |      | 31640477  | Insertion | 8  |
|                    |    |                 |    |      | 31640485  | Insertion | 8  |
| AC002472.1         | -1 | ENSG00000269103 | 22 | 48   | 21360718  | Deletion  | 2  |
|                    |    |                 |    |      | 21360676  | Insertion | 1  |
| AC020629.1         | 1  | ENSG00000269367 | 12 | 55   | 42624063  | Deletion  | 4  |
|                    |    |                 |    |      | 42624068  | Insertion | 14 |
|                    |    |                 |    |      | 42624063  | Insertion | 4  |
|                    |    |                 |    |      | 42624091  | Insertion | 4  |
|                    |    |                 |    |      | 42624077  | Insertion | 5  |
| AL031663.2         | 1  | ENSG00000269549 | 20 | 29   | 44075130  | Deletion  | 1  |
|                    |    |                 |    |      | 44075137  | Insertion | 1  |
| AL589739.1         | 1  | ENSG00000269753 | 1  | 1708 | 2258754   | Deletion  | 10 |
|                    |    |                 |    |      | 2258626   | Deletion  | 2  |
|                    |    |                 |    |      | 2258772   | Deletion  | 2  |
|                    |    |                 |    |      | 2258740   | Deletion  | 4  |
|                    |    |                 |    |      | 2258896   | Deletion  | 8  |
|                    |    |                 |    |      | 2258590   | Insertion | 2  |
|                    |    |                 |    |      | 2258930   | Insertion | 2  |
|                    |    |                 |    |      | 2258590   | Insertion | 4  |
|                    |    |                 |    |      | 2258940   | Insertion | 7  |
|                    |    |                 |    |      | 2258860   | Insertion | 8  |
| RP11-<br>156E8.1   | -1 | ENSG00000272195 | 1  | 1704 | 245134086 | Deletion  | 1  |
|                    |    |                 |    |      | 245133549 | Deletion  | 2  |
|                    |    |                 |    |      | 245133623 | Insertion | 5  |
| RP11-<br>216L13.17 | 1  | ENSG00000272896 | 9  | 5    | 139694454 | Insertion | 1  |
|                    |    |                 |    |      | 139694457 | Insertion | 1  |
|                    |    |                 |    |      | 139694456 | Insertion | 2  |

|          |    |                 |    |      |           |           |   |
|----------|----|-----------------|----|------|-----------|-----------|---|
| OR5AL1   | 1  | ENSG00000272987 | 11 | 43   | 56180826  | Insertion | 1 |
|          |    |                 |    |      | 56180636  | Insertion | 2 |
| PPP1R9B  | -1 | ENSG00000108819 | 17 | 2504 | 48227384  | Insertion | 2 |
|          |    |                 |    |      | 48227403  | Insertion | 2 |
| SON      | 1  | ENSG00000159140 | 21 | 2504 | 34948696  | Deletion  | 1 |
|          |    |                 |    |      | 34948684  | Insertion | 1 |
| B3GNT6   | 1  | ENSG00000198488 | 11 | 2504 | 76751541  | Deletion  | 1 |
|          |    |                 |    |      | 76751584  | Deletion  | 1 |
|          |    |                 |    |      | 76751603  | Deletion  | 1 |
| IGHV3-21 | -1 | ENSG00000211947 | 14 | 2    | 106691867 | Deletion  | 1 |
|          |    |                 |    |      | 106691871 | Insertion | 1 |
| SCARF2   | -1 | ENSG00000244486 | 22 | 2504 | 20779973  | Insertion | 1 |
|          |    |                 |    |      | 20780024  | Insertion | 1 |
|          |    |                 |    |      | 20780029  | Insertion | 1 |

Table S5. NFS indels that introduce premature stop codons (introduced premature stop codons are underlined)

| Ensembl_ID                             | Gene          | Strand | Chr. | Position  | Type      | ref_seq        | variant_seq                                              |
|----------------------------------------|---------------|--------|------|-----------|-----------|----------------|----------------------------------------------------------|
| ENSG00000204869                        | IGFL4         | -1     | 19   | 46543527  | Deletion  | tGGCCCTGCTTCag | <u>tag</u>                                               |
| ENSG00000231171                        | LINC01098     | 1      | 4    | 178897086 | Deletion  | tCTAaa         | <u>taa</u>                                               |
| ENSG00000133063                        | CHIT1         | -1     | 1    | 203186950 | Insertion | tgg            | <u>tAGGGACTGGGCGGGCCATGGTCTgg</u>                        |
| ENSG00000168970                        | JMJD7-PLA2G4B | 1      | 15   | 42140022  | Insertion | -              | <u>GCAGTGCAGCGGAGGGCGGCAGCGCAGGCCCCACTGATGGCCGGGGCCT</u> |
| ENSG00000124074                        | ENKD1         | -1     | 16   | 67699975  | Insertion | -              | <u>TGA</u>                                               |
| ENSG00000268461                        | AC078899.2    | -1     | 19   | 20047782  | Insertion | gaa            | <u>gTTTTTaa</u>                                          |
| ENSG00000142025                        | DMRTC2        | 1      | 19   | 42355761  | Insertion | c              | <u>cTAGAAA</u>                                           |
| ENSG00000167766                        | ZNF83         | -1     | 19   | 53117029  | Insertion | tgt            | <u>tgATgt</u>                                            |
| * two cases with stop retained variant |               |        |      |           |           |                |                                                          |
| ENSG00000140853                        | NLRCS         | 1      | 16   | 57095835  | Insertion | taa            | tAAGAAAAAAGAaa*                                          |
| ENSG00000064270                        | ATP2C2        | 1      | 16   | 84497336  | Insertion | tag            | tAGTGGAAg*                                               |
